# Supplementary material for: Trinuclear molybdenum clusters with sulfide bridges as potential anionic receptors via chalcogen bonding
Source: Royal Society of Chemistry journal article supplement (doi:10.1039/d1ce00514f), 2021-01-01
Supplement: d1ce00514f1.pdf [file d1ce00514f1.pdf]

## Supporting Information

### Trinuclear molybdenum clusters with sulfide bridges as potential anionic receptors via chalcogen bonding

Alexander S. Novikov<sup>\*,1</sup>, Artem L. Gushchin<sup>2</sup>

<sup>1</sup> Saint Petersburg State University, Universitetskaya Nab., 7/9, Saint Petersburg 199034, Russian Federation; [a.s.novikov@spbu.ru](mailto:a.s.novikov@spbu.ru) ORCID: <https://orcid.org/0000-0001-9913-5324>

<sup>2</sup> Nikolaev Institute of Inorganic Chemistry, Siberian Branch of Russian Academy of Sciences, 3 Acad. Lavrentiev Ave., Novosibirsk 630090, Russian Federation; [gushchin@niic.nsc.ru](mailto:gushchin@niic.nsc.ru) ORCID: <https://orcid.org/0000-0003-3214-1433>

**Table S1.** Cartesian atomic coordinates for model supramolecular associates.

| Atom          | X         | Y         | Z         |
|---------------|-----------|-----------|-----------|
| <b>SAQBOB</b> |           |           |           |
| I             | 15.623812 | 13.246100 | 16.431629 |
| Mo            | 17.460406 | 14.556395 | 12.430017 |
| Mo            | 17.394981 | 11.847809 | 12.437739 |
| Mo            | 19.398110 | 13.163459 | 13.735958 |
| S             | 17.750851 | 15.903281 | 10.387564 |
| S             | 16.007933 | 16.611886 | 12.568185 |
| S             | 17.610585 | 10.482896 | 10.400543 |
| S             | 15.854037 | 9.855325  | 12.581492 |
| S             | 21.800725 | 13.074214 | 13.130385 |
| S             | 20.808950 | 13.141326 | 15.834599 |
| S             | 15.775230 | 13.241102 | 11.180756 |
| S             | 19.418680 | 15.647683 | 13.504967 |
| S             | 19.291052 | 10.672274 | 13.541603 |
| S             | 15.592339 | 13.240924 | 13.231752 |
| S             | 18.008088 | 14.845013 | 14.767535 |
| S             | 17.919864 | 11.568651 | 14.774600 |
| S             | 19.068510 | 13.160782 | 11.384476 |
| N             | 16.160342 | 18.061403 | 10.330555 |
| N             | 15.962086 | 8.372966  | 10.351913 |
| N             | 23.421468 | 12.822722 | 15.237897 |
| C             | 22.197237 | 12.992287 | 14.814029 |
| C             | 24.541615 | 12.647801 | 14.331017 |
| C             | 16.591549 | 17.013667 | 10.994287 |
| C             | 15.278103 | 19.080581 | 10.925285 |
| C             | 16.415597 | 9.424272  | 11.009073 |
| C             | 16.348685 | 8.194476  | 8.886446  |
| C             | 15.503619 | 9.076216  | 7.986137  |
| C             | 23.723809 | 12.735262 | 16.705007 |
| C             | 16.569245 | 18.245248 | 8.876589  |
| C             | 15.726657 | 17.370647 | 7.966422  |
| C             | 24.063322 | 14.104280 | 17.276736 |
| C             | 13.853138 | 18.903876 | 10.632849 |

|               |           |           |           |
|---------------|-----------|-----------|-----------|
| C             | 15.144280 | 7.303811  | 10.958143 |
| C             | 13.776314 | 7.257403  | 10.537561 |
| C             | 24.856346 | 11.212742 | 14.045152 |
| H             | 25.324726 | 13.070823 | 14.715455 |
| H             | 24.340880 | 13.099381 | 13.496423 |
| H             | 15.553183 | 19.953397 | 10.603277 |
| H             | 15.399535 | 19.071657 | 11.886381 |
| H             | 17.285445 | 8.419373  | 8.769800  |
| H             | 16.229732 | 7.266328  | 8.631797  |
| H             | 15.756396 | 8.936994  | 7.071042  |
| H             | 15.639920 | 9.997225  | 8.219429  |
| H             | 14.576772 | 8.851319  | 8.097854  |
| H             | 24.469747 | 12.131965 | 16.844654 |
| H             | 22.953088 | 12.372927 | 17.169948 |
| H             | 17.506005 | 18.013211 | 8.771443  |
| H             | 16.460204 | 19.175181 | 8.625225  |
| H             | 15.999259 | 17.500944 | 7.054613  |
| H             | 14.799810 | 17.609823 | 8.060067  |
| H             | 15.843133 | 16.449638 | 8.206285  |
| H             | 24.256622 | 14.020390 | 18.213189 |
| H             | 23.317384 | 14.695082 | 17.155162 |
| H             | 24.831564 | 14.457690 | 16.821653 |
| H             | 13.350063 | 19.596417 | 11.066574 |
| H             | 13.563189 | 18.047124 | 10.956500 |
| H             | 13.711881 | 18.952068 | 9.684895  |
| H             | 15.558140 | 6.448844  | 10.752780 |
| H             | 15.166584 | 7.410905  | 11.922525 |
| H             | 13.307934 | 6.548798  | 10.999215 |
| H             | 13.736663 | 7.100332  | 9.591250  |
| H             | 13.350063 | 8.094522  | 10.739637 |
| H             | 25.599806 | 11.162765 | 13.438922 |
| H             | 24.090582 | 10.789721 | 13.647570 |
| H             | 25.079384 | 10.764732 | 14.863316 |
| <b>SAQBUH</b> |           |           |           |
| Mo            | 7.576996  | 11.700947 | 11.483875 |
| Mo            | 7.540854  | 14.400619 | 11.483875 |
| Mo            | 5.573674  | 13.024141 | 12.754625 |
| S             | 7.398866  | 10.333350 | 9.444500  |
| S             | 9.128538  | 9.740132  | 11.649625 |
| S             | 7.313673  | 15.775320 | 9.460750  |
| S             | 9.058834  | 16.384522 | 11.651250 |
| S             | 3.188276  | 12.967306 | 12.132250 |
| S             | 4.153794  | 13.015261 | 14.846000 |
| S             | 9.244710  | 13.070320 | 10.278125 |
| S             | 5.661449  | 10.537601 | 12.559625 |
| S             | 5.591746  | 15.510681 | 12.545000 |
| S             | 9.376371  | 13.075648 | 12.293125 |
| S             | 7.006462  | 11.402562 | 13.806000 |

|   |           |           |           |
|---|-----------|-----------|-----------|
| S | 6.959994  | 14.688347 | 13.806000 |
| S | 5.924772  | 13.025917 | 10.406500 |
| N | 9.115630  | 8.285507  | 9.386000  |
| C | 8.612218  | 9.317421  | 10.076625 |
| C | 8.756787  | 8.047509  | 8.012875  |
| C | 10.050169 | 7.337069  | 10.047375 |
| C | 9.544175  | 8.885828  | 7.068750  |
| C | 11.482957 | 7.553753  | 9.628125  |
| N | 8.965897  | 17.887103 | 9.418500  |
| C | 8.519280  | 16.819667 | 10.075000 |
| C | 8.612218  | 18.116220 | 8.035625  |
| C | 9.895273  | 18.810675 | 10.042500 |
| C | 9.353137  | 17.253035 | 7.049250  |
| C | 11.320316 | 18.597543 | 9.633000  |
| N | 1.543797  | 12.780816 | 14.239875 |
| C | 2.788128  | 12.903367 | 13.801125 |
| C | 1.226260  | 12.747070 | 15.707250 |
| C | 0.423382  | 12.612086 | 13.316875 |
| C | 1.019732  | 14.082697 | 16.267875 |
| C | 0.054214  | 11.191206 | 13.089375 |
| H | 7.793850  | 8.241104  | 7.891000  |
| H | 8.903938  | 7.093743  | 7.798375  |
| H | 9.784264  | 6.411721  | 9.823125  |
| H | 9.980466  | 7.445411  | 11.028875 |
| H | 9.267944  | 8.690457  | 6.149000  |
| H | 10.496786 | 8.685129  | 7.171125  |
| H | 9.386698  | 9.832490  | 7.262125  |
| H | 12.058654 | 6.909029  | 10.088000 |
| H | 11.759188 | 8.464893  | 9.863750  |
| H | 11.562986 | 7.429426  | 8.658000  |
| H | 8.785185  | 19.064657 | 7.817875  |
| H | 7.641536  | 17.956371 | 7.926750  |
| H | 9.825570  | 18.716542 | 11.025625 |
| H | 9.629368  | 19.736023 | 9.808500  |
| H | 9.058834  | 17.467944 | 6.139250  |
| H | 9.169843  | 16.309926 | 7.237750  |
| H | 10.316074 | 17.421765 | 7.127250  |
| H | 11.890850 | 19.251148 | 10.086375 |
| H | 11.400346 | 18.711213 | 8.662875  |
| H | 11.596547 | 17.691732 | 9.880000  |
| H | 0.410474  | 12.205359 | 15.850250 |
| H | 1.969761  | 12.306597 | 16.188250 |
| H | 0.660890  | 13.024141 | 12.447500 |
| H | -0.364006 | 13.095185 | 13.674375 |
| H | 0.815786  | 14.008101 | 17.225000 |
| H | 0.271068  | 14.517841 | 15.809625 |
| H | 1.830354  | 14.617303 | 16.147625 |
| H | -0.699614 | 11.145027 | 12.463750 |

|               |           |           |           |
|---------------|-----------|-----------|-----------|
| H             | -0.203946 | 10.780927 | 13.940875 |
| H             | 0.820949  | 10.709883 | 12.712375 |
| Cl            | 10.099219 | 13.072096 | 15.652000 |
| O             | 10.383195 | 13.034798 | 17.033250 |
| O             | 10.625866 | 14.286948 | 15.065375 |
| O             | 10.690406 | 11.940720 | 15.019875 |
| O             | 8.689666  | 13.025917 | 15.470000 |
| <b>SAQCAO</b> |           |           |           |
| Mo            | 13.568384 | 9.830755  | 2.697187  |
| Mo            | 13.675880 | 12.408431 | 3.579266  |
| Mo            | 15.031524 | 11.678159 | 1.331079  |
| S             | 11.523571 | 8.676386  | 1.920193  |
| S             | 13.618549 | 7.426854  | 3.420046  |
| S             | 13.847874 | 13.782089 | 5.680970  |
| S             | 11.760062 | 13.976553 | 3.716195  |
| S             | 14.596762 | 12.443600 | -0.955320 |
| S             | 17.213693 | 12.056742 | 0.127376  |
| S             | 15.911797 | 9.619741  | 2.213158  |
| S             | 14.767562 | 9.325977  | 0.563639  |
| S             | 14.298162 | 10.490689 | 4.900792  |
| S             | 12.296348 | 10.660328 | 4.652408  |
| S             | 16.031237 | 12.722883 | 3.254457  |
| S             | 14.947916 | 14.019997 | 2.159023  |
| S             | 12.660640 | 11.700915 | 1.544434  |
| N             | 11.431602 | 6.088365  | 2.623946  |
| N             | 11.828143 | 15.534330 | 5.993041  |
| N             | 16.833874 | 12.958722 | -2.343718 |
| C             | 12.127938 | 7.257215  | 2.662158  |
| C             | 12.354874 | 14.564081 | 5.231969  |
| C             | 16.314310 | 12.571864 | -1.114540 |
| C             | 10.060431 | 5.980789  | 2.031647  |
| C             | 12.059857 | 4.847108  | 3.219428  |
| C             | 10.161955 | 5.507043  | 0.652802  |
| C             | 11.657344 | 4.675401  | 4.802075  |
| C             | 12.262905 | 15.943945 | 7.324120  |
| C             | 10.663603 | 16.363903 | 5.359345  |
| C             | 13.316366 | 17.077626 | 6.957914  |
| C             | 9.567144  | 15.821888 | 5.665048  |
| C             | 15.831772 | 13.018716 | -3.668429 |
| C             | 18.480951 | 13.287655 | -2.369194 |
| C             | 15.235766 | 11.667815 | -4.353075 |
| C             | 18.915713 | 11.988473 | -3.037918 |
| H             | 9.533701  | 5.403605  | 2.553889  |
| H             | 9.657918  | 6.872426  | 2.015725  |
| H             | 12.955657 | 4.929859  | 3.136634  |
| H             | 11.669288 | 4.129248  | 2.741768  |
| H             | 9.254211  | 5.432568  | 0.289780  |
| H             | 10.550135 | 4.623682  | 0.649618  |

|               |           |           |           |
|---------------|-----------|-----------|-----------|
| H             | 10.664798 | 6.092503  | 0.111454  |
| H             | 12.016858 | 3.924441  | 5.110962  |
| H             | 10.665992 | 4.683676  | 4.875316  |
| H             | 11.955944 | 5.482218  | 5.270182  |
| H             | 12.735887 | 15.277804 | 7.718986  |
| H             | 11.564181 | 16.330803 | 7.766752  |
| H             | 10.467722 | 17.046595 | 6.040807  |
| H             | 10.886956 | 16.684561 | 4.575983  |
| H             | 13.611382 | 17.423109 | 7.741276  |
| H             | 12.806357 | 17.766524 | 6.438857  |
| H             | 13.970897 | 16.717662 | 6.387906  |
| H             | 8.895891  | 16.243915 | 4.942189  |
| H             | 9.297210  | 15.312973 | 6.139523  |
| H             | 9.723610  | 14.938527 | 5.251076  |
| H             | 15.043468 | 13.486256 | -3.362726 |
| H             | 16.294005 | 13.616588 | -4.279834 |
| H             | 18.673250 | 13.960002 | -2.951939 |
| H             | 18.817772 | 13.357993 | -1.496668 |
| H             | 14.829670 | 11.990542 | -5.184203 |
| H             | 14.912084 | 11.144418 | -3.865862 |
| H             | 16.169787 | 11.278888 | -4.795706 |
| H             | 19.922592 | 11.986404 | -3.034733 |
| H             | 18.577698 | 11.804353 | -3.824464 |
| H             | 18.726998 | 11.210618 | -2.381931 |
| S             | 17.916000 | 10.343807 | 5.308395  |
| O             | 16.881650 | 10.513446 | 4.391288  |
| O             | 18.950350 | 10.174169 | 4.391288  |
| O             | 17.545736 | 9.363214  | 6.223368  |
| O             | 18.286264 | 11.324400 | 6.223368  |
| <b>VIFXUD</b> |           |           |           |
| Mo            | 2.084387  | 0.824941  | 14.175644 |
| Mo            | 2.083726  | 0.820599  | 11.454290 |
| Mo            | 0.581026  | -0.990823 | 12.815601 |
| S             | 2.952955  | -0.912783 | 12.812884 |
| S             | 3.504068  | 2.338595  | 12.796941 |
| S             | 1.500312  | 2.721600  | 12.807811 |
| S             | 0.778854  | -0.970351 | 15.293101 |
| S             | -0.294525 | 0.554593  | 14.444320 |
| S             | 0.780015  | -0.979160 | 10.350784 |
| S             | -0.300697 | 0.542062  | 11.175107 |
| S             | 3.982025  | 0.278165  | 15.671927 |
| S             | 2.086627  | 2.373335  | 16.154202 |
| S             | 4.066001  | 0.308934  | 10.070695 |
| S             | 2.195624  | 2.408943  | 9.492944  |
| S             | -1.632731 | -2.218496 | 12.878649 |
| S             | 0.960277  | -3.413538 | 12.776831 |
| C             | 3.481956  | 1.540949  | 16.720177 |
| N             | 4.081862  | 1.844921  | 17.861185 |

|    |           |           |           |
|----|-----------|-----------|-----------|
| C  | 3.576806  | 2.919367  | 18.725728 |
| H  | 3.140883  | 3.589345  | 18.176783 |
| H  | 4.325418  | 3.343687  | 19.173218 |
| C  | 2.613621  | 2.420606  | 19.747527 |
| H  | 2.261452  | 3.162544  | 20.243933 |
| H  | 3.062604  | 1.818866  | 20.345388 |
| H  | 1.894087  | 1.957825  | 19.309096 |
| C  | 5.214317  | 1.065761  | 18.377882 |
| H  | 5.271301  | 0.232011  | 17.886911 |
| H  | 5.046576  | 0.848639  | 19.309096 |
| C  | 6.518701  | 1.774201  | 18.278238 |
| H  | 7.206264  | 1.239459  | 18.682247 |
| H  | 6.460283  | 2.617877  | 18.732975 |
| H  | 6.731515  | 1.923085  | 17.354272 |
| C  | 3.739188  | 1.743184  | 9.167201  |
| N  | 4.625192  | 2.281647  | 8.347588  |
| C  | 4.337686  | 3.522347  | 7.621821  |
| H  | 3.376576  | 3.620363  | 7.531236  |
| H  | 4.714795  | 3.462794  | 6.730464  |
| C  | 4.889860  | 4.732030  | 8.308455  |
| H  | 4.734575  | 5.507467  | 7.764945  |
| H  | 5.834950  | 4.620367  | 8.442521  |
| H  | 4.457518  | 4.844934  | 9.158142  |
| C  | 5.964497  | 1.707203  | 8.207000  |
| H  | 6.347394  | 2.012415  | 7.368183  |
| H  | 5.884550  | 0.741939  | 8.156272  |
| C  | 6.904682  | 2.052118  | 9.312137  |
| H  | 7.759787  | 1.647650  | 9.143648  |
| H  | 6.553780  | 1.723332  | 10.143707 |
| H  | 7.004988  | 3.004975  | 9.361052  |
| C  | -0.731366 | -3.673713 | 12.935536 |
| N  | -1.236012 | -4.897043 | 13.066703 |
| C  | -2.656779 | -5.127813 | 13.265265 |
| H  | -3.003876 | -5.598038 | 12.489858 |
| H  | -3.106121 | -4.269249 | 13.310558 |
| C  | -2.999177 | -5.911935 | 14.491786 |
| H  | -3.951643 | -6.019876 | 14.546137 |
| H  | -2.685526 | -5.444192 | 15.269005 |
| H  | -2.580372 | -6.775463 | 14.448305 |
| C  | -0.351886 | -6.059579 | 13.006192 |
| H  | 0.279598  | -5.934268 | 12.281512 |
| H  | -0.883971 | -6.844942 | 12.799659 |
| C  | 0.423886  | -6.321366 | 14.290687 |
| H  | 0.963417  | -7.109211 | 14.183797 |
| H  | -0.191603 | -6.451640 | 15.015367 |
| H  | 0.989425  | -5.569502 | 14.480916 |
| Cl | -1.529488 | 2.831029  | 12.875569 |
